# Supplementary material for: A sulfonated chitooligosaccharide modified silica material for hydrophilic interaction liquid chromatography and its chromatographic evaluation
Source: Royal Society of Chemistry journal article supplement (doi:10.1039/c8ay00070k), 2018-01-01
Supplement: c8ay00070k1.pdf [file c8ay00070k1.pdf]

**ELECTRONIC SUPPLEMENTARY INFORMATION (ESI)**

**Sulfonated chitooligosaccharide modified silica material for hydrophilic interaction liquid chromatography and its chromatographic evaluation**

Kui Yan<sup>a</sup>, Haiyan Yang<sup>b</sup>, Shaohua Huang<sup>b,\*</sup>, and Zhengwu Bai<sup>a,\*</sup>

<sup>a</sup> *School of Chemistry and Environmental Engineering, Wuhan Institute of Technology, Wuhan 430073, China.*

<sup>b</sup> *Shandong Provincial Key Laboratory of Synthetic Biology, Qingdao Institute of Bioenergy and Bioprocess Technology, Chinese Academy of Sciences, Qingdao 266101, China.*

Corresponding authors. E-mail address: [huangsh@qibebt.ac.cn](mailto:huangsh@qibebt.ac.cn) (S. Huang);  
[zwbai@wit.edu.cn](mailto:zwbai@wit.edu.cn) (Z. Bai)

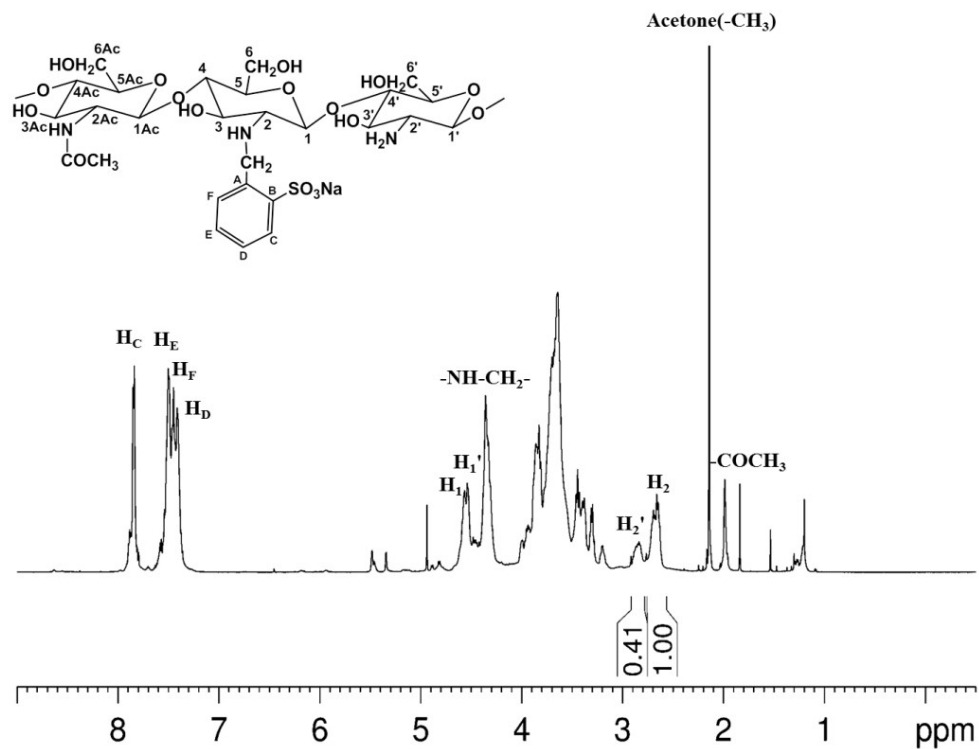

Fig. S1. 600 MHz <sup>1</sup>H NMR spectrum of COS(BSS). Sulfonated ratio was calculated from the ratio of the integral area of H<sub>2</sub> to that of H<sub>2</sub> and H<sub>2'</sub>.

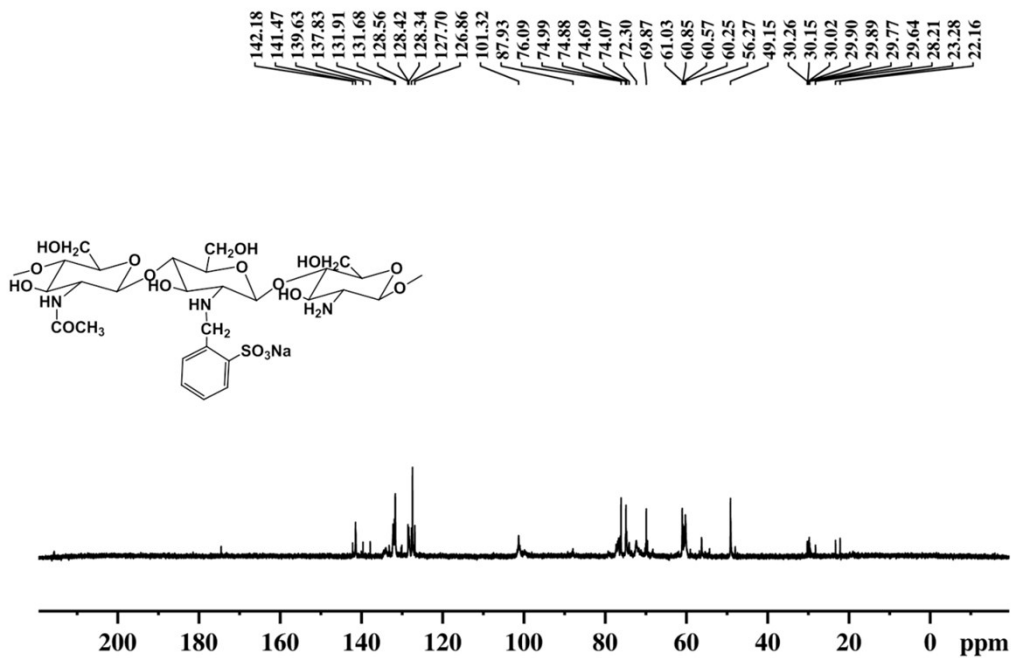

Fig. S2. 150 MHz <sup>13</sup>C NMR spectrum of COS(BSS).

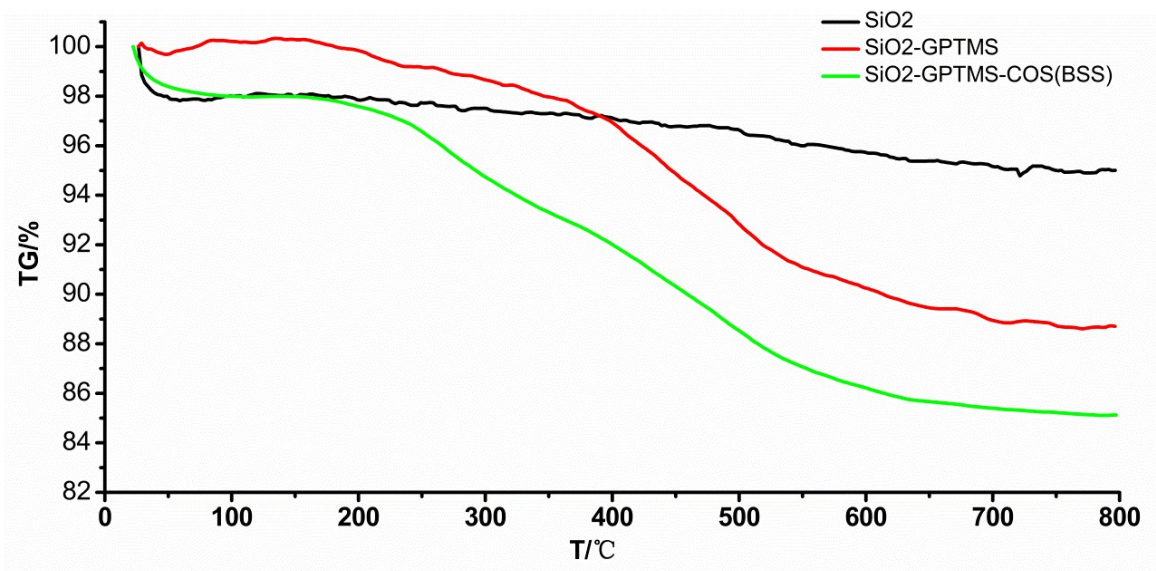

Fig. S3. TGA of SiO<sub>2</sub>, SiO<sub>2</sub>-GPTMS, and SiO<sub>2</sub>-GPTMS-COS(BSS) under nitrogen flow, respectively.

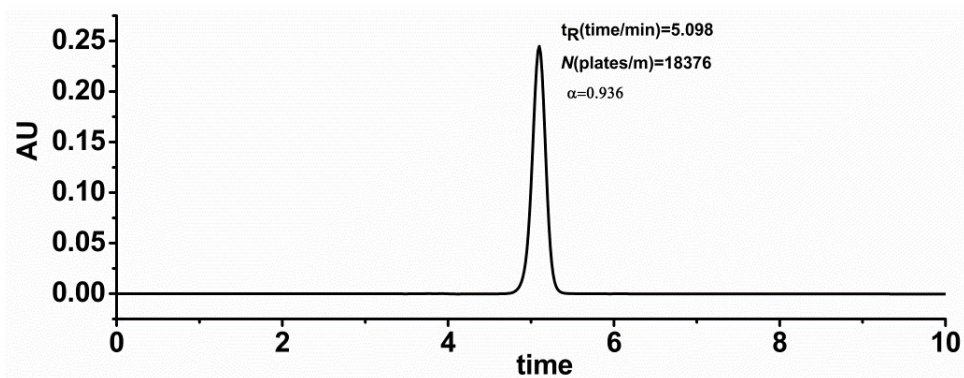

Fig. S4. Chromatogram for the column efficiency of SiO<sub>2</sub>-GPTMS-COS(BSS). Chromatographic conditions: probe compound: uracil; mobile phase: ACN/H<sub>2</sub>O = 90/ 10 (v/v); flow rate: 1.0 mL min<sup>-1</sup>; detection: UV detector 254 nm; column temperature: 30 °C; inject volume: 5 uL.

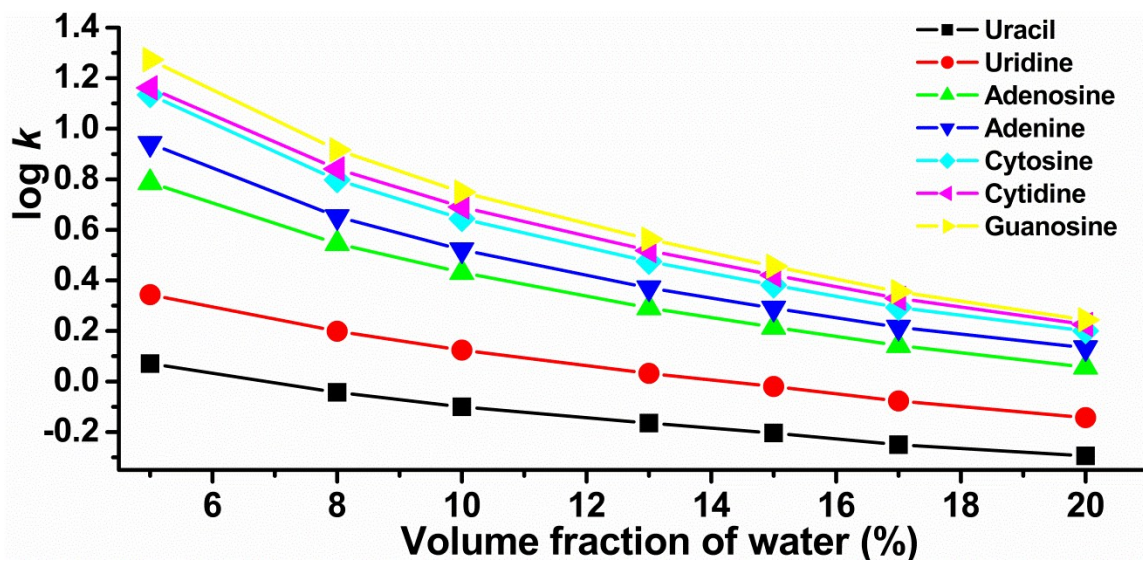

Fig. S5. Plot of  $\log k$  versus the water volume fraction in eluent.

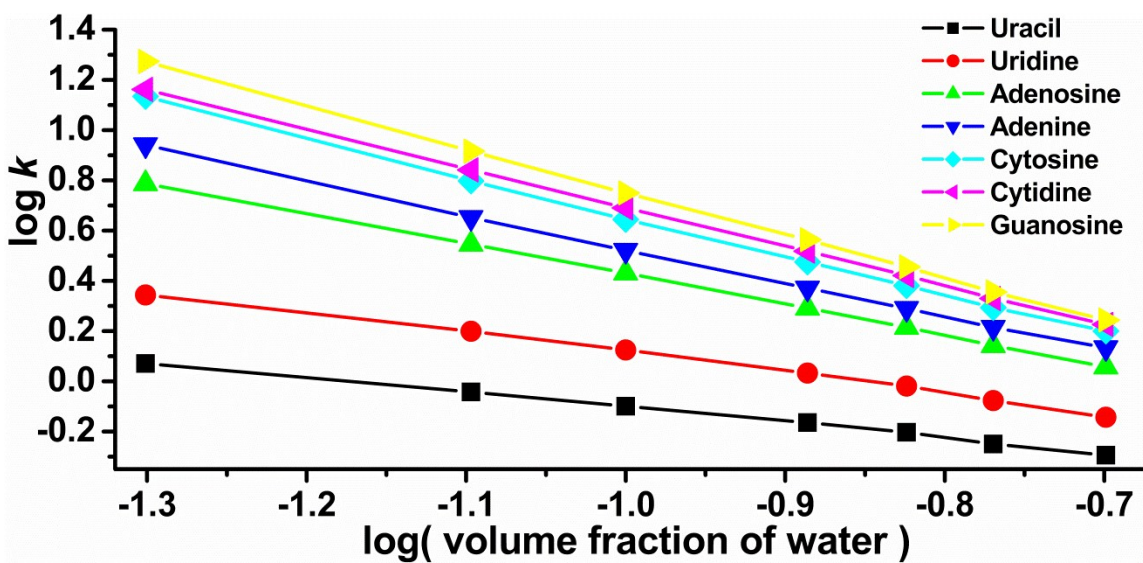

Fig. S6. Plot of  $\log k$  versus logarithm of the water volume fraction in eluent.

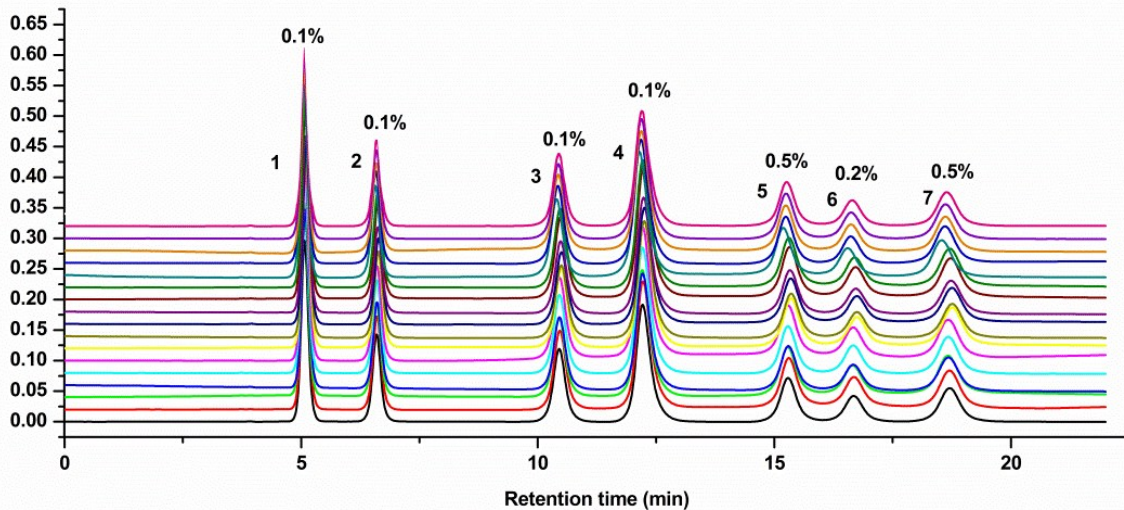

Fig. S7. Retention stability of seven nucleosides and bases including (1) uracil, (2) uridine, (3) adenosine, (4) adenine, (5) cytosine, (6) cytidine, and (7) guanosine on SiO<sub>2</sub>-GPTMS-COS(BSS) by continuously injecting 18 times. Chromatographic conditions: mobile phase: ACN/H<sub>2</sub>O = 90/10 (v/v); flow rate: 1.0 mL min<sup>-1</sup>; detection: UV detector, 254 nm; column temperature: 30 °C; inject volume: 5 uL.

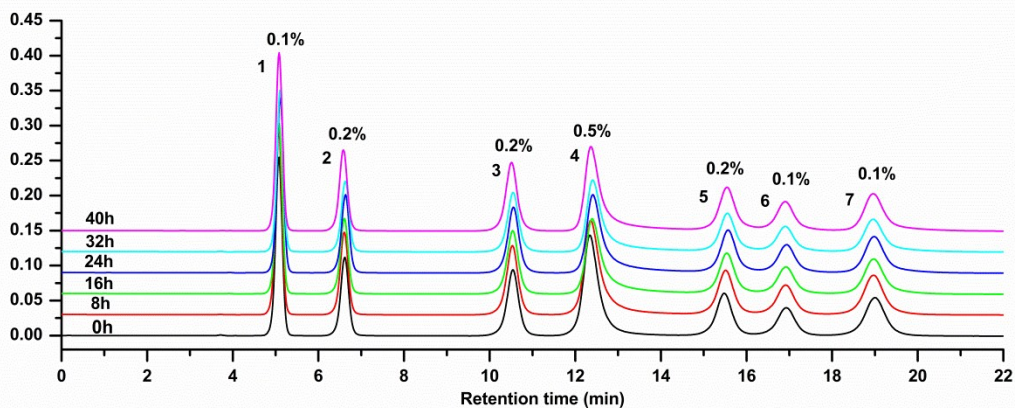

Fig. S8. Retention stability of seven nucleosides and bases including (1) uracil, (2) uridine, (3) adenosine, (4) adenine, (5) cytosine, (6) cytidine, and (7) guanosine on SiO<sub>2</sub>-GPTMS-COS(BSS) by continuously injecting 6 times with an interval of 8 hours of incessantly working. Chromatographic conditions: mobile phase: ACN/H<sub>2</sub>O = 90/10 (v/v); flow rate: 1.0 mL min<sup>-1</sup>; detection: UV detector, 254 nm; column temperature: 30 °C; inject volume: 5 uL.

**Table S1.** EA data of the bonded silica gels

|                                  | N (%) | C (%) | H (%) | S (%) |
|----------------------------------|-------|-------|-------|-------|
| SiO <sub>2</sub> -GPTMS          | 0     | 6.55  | 1.43  | 0     |
| SiO <sub>2</sub> -GPTMS-COS(BSS) | 0.53  | 7.77  | 1.34  | 0.38  |

**Table S2.** Correlation coefficients of fitting the Eqs. (1) and (2) for tested solutes

| Test solutes | Correlation coefficient ( $R^2$ ) |        |
|--------------|-----------------------------------|--------|
|              | Eq.(1)                            | Eq.(2) |
| Uracil       | 0.9762                            | 0.9969 |
| Uridine      | 0.9810                            | 0.9956 |
| Adenosine    | 0.9648                            | 0.9997 |
| Adenine      | 0.9496                            | 0.9993 |
| Cytosine     | 0.9486                            | 0.9992 |
| Cytidine     | 0.9588                            | 0.9999 |
| Guanosine    | 0.9568                            | 0.9998 |

**Table S3.** Parameters of  $\ln k$  and  $1/T$  based on Van't Hoff equation for tested solutes

| Solutes   | $\Delta H^\theta$ (KJ/mol) | Correlation coefficient ( $R^2$ ) |
|-----------|----------------------------|-----------------------------------|
| Uracil    | -12.68                     | 0.9963                            |
| Uridine   | -13.28                     | 0.9974                            |
| Adenosine | -11.24                     | 0.9974                            |
| Adenine   | -9.48                      | 0.9969                            |
| Cytosine  | -6.70                      | 0.9979                            |
| Cytidine  | -10.27                     | 0.9975                            |
| Guanosine | -9.26                      | 0.9983                            |
